# Supplementary figures and images for: Assessing the Genetic Diversity of Daylily Germplasm Using SSR Markers: Implications for Daylily Breeding
Source: MDPI journal article supplement (doi:10.3390/plants12091752), 2023-04-25

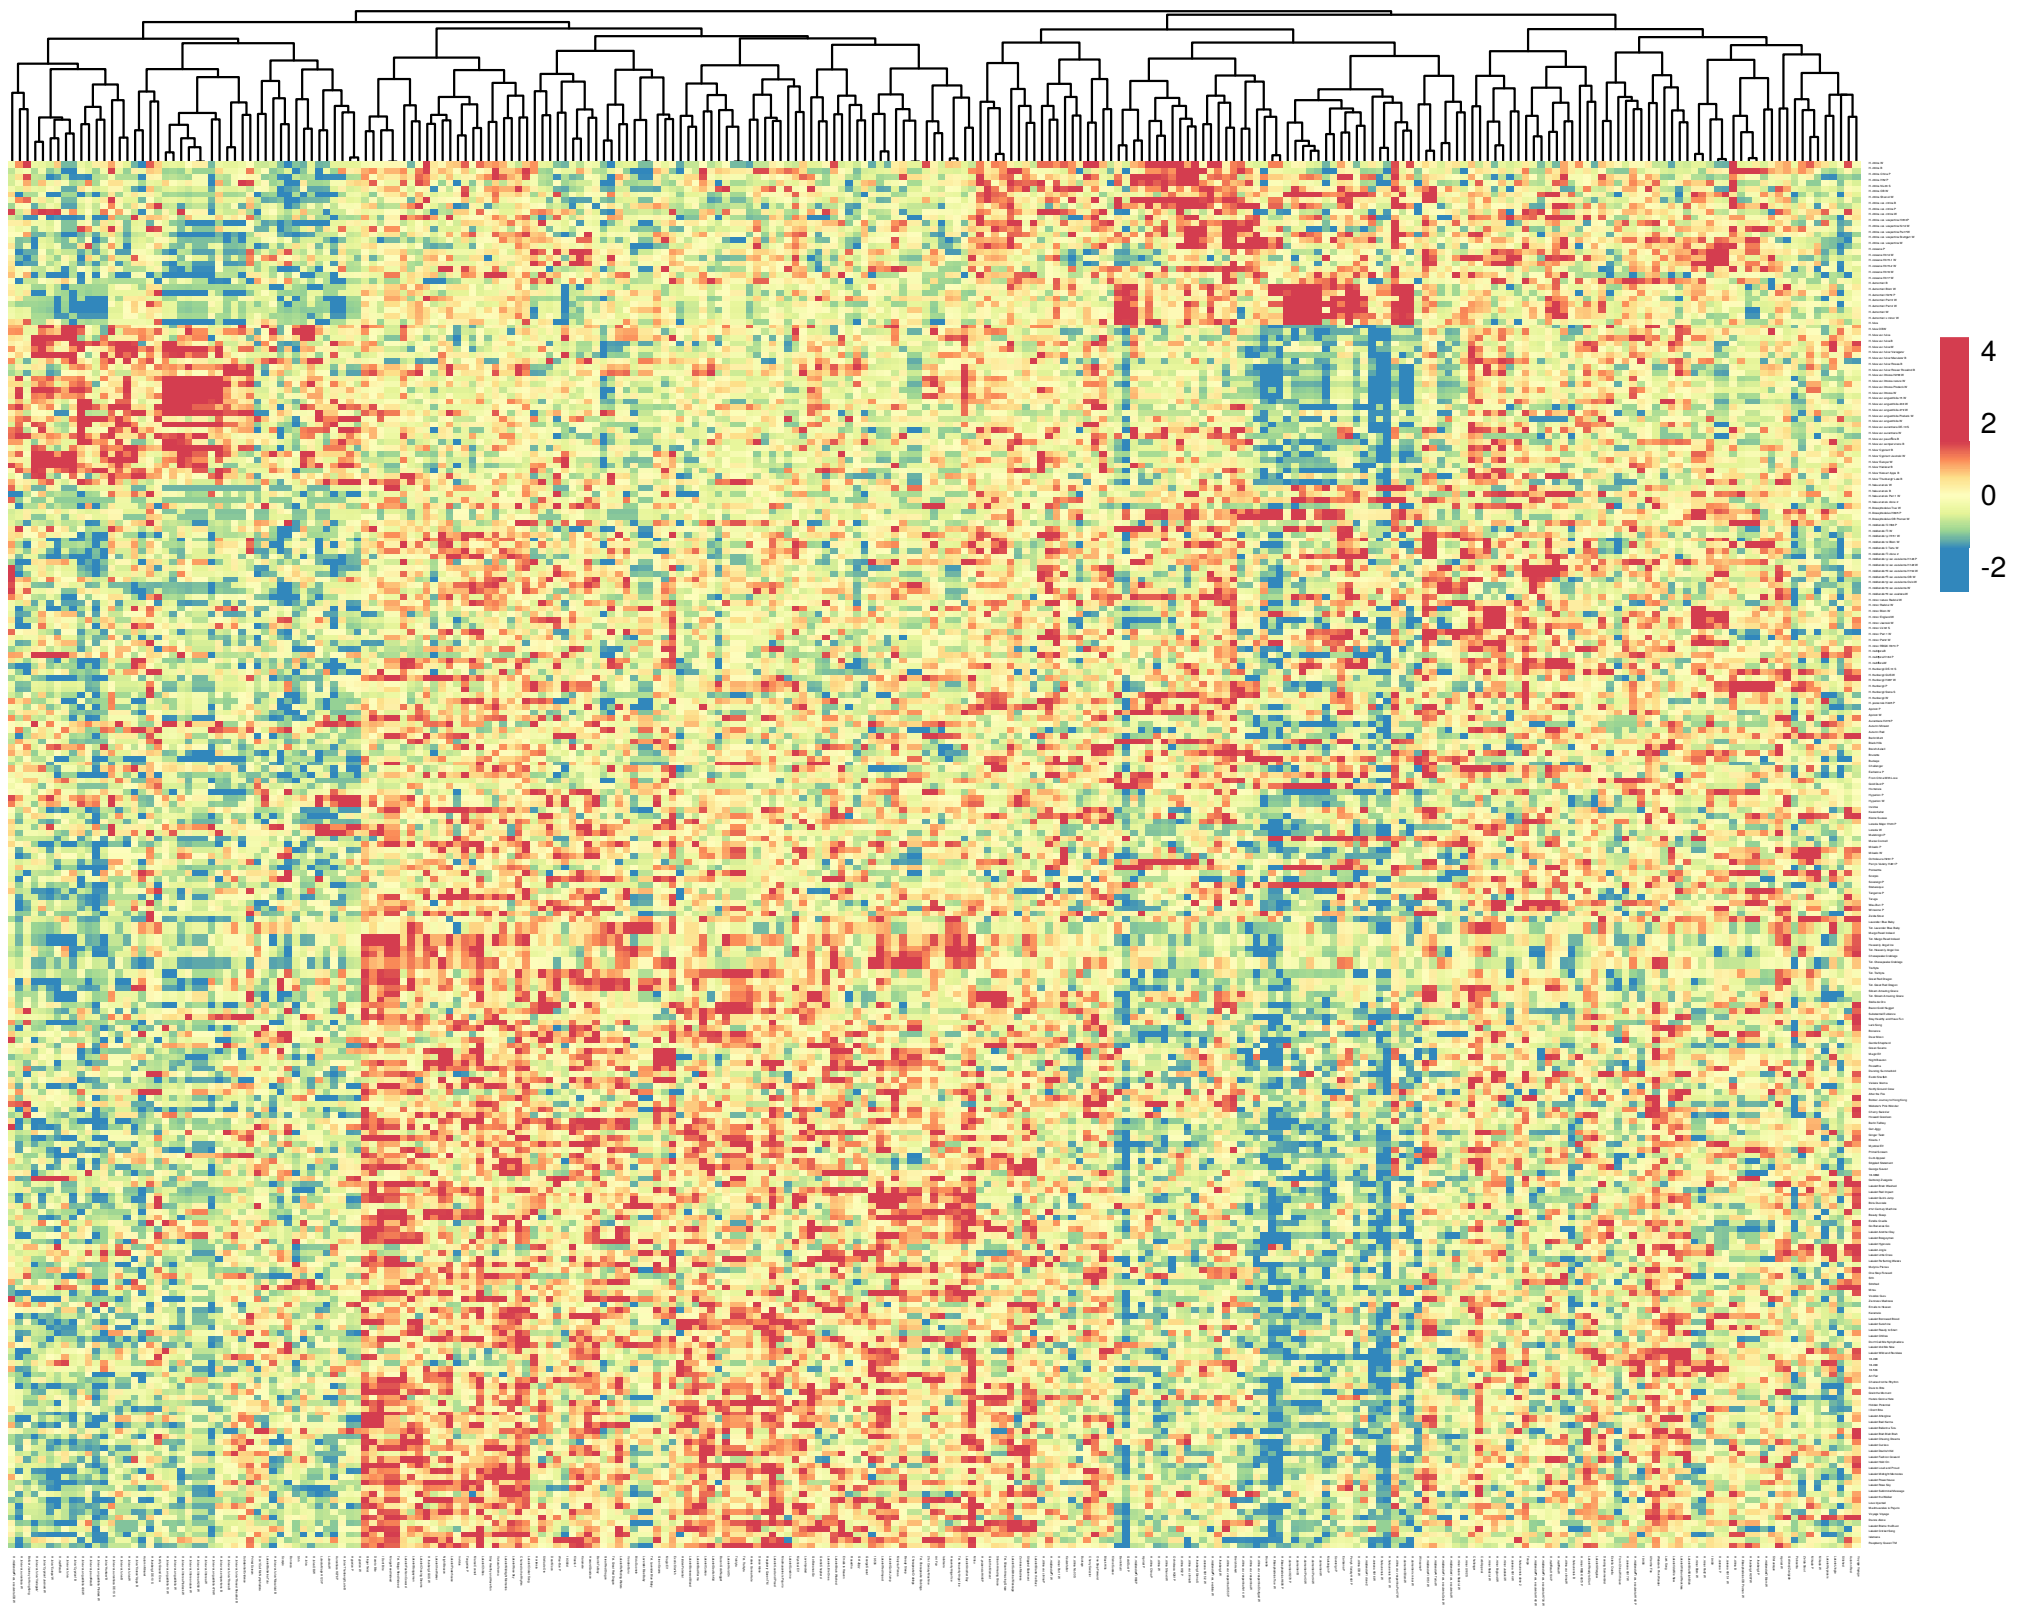

Figure S3. Daylily genotype similarity clustering using heatmap

Supplement: s1 [file s1]
